# Supplementary material
Source: PubMed Central journal article supplement (PMC6858855)
Supplement: EMS84889-supplement-Supplementary_Materials.pdf [file EMS84889-supplement-Supplementary_Materials.pdf]

Supplementary Materials for  
**Ebola vaccine R&D: Filling the knowledge gaps**

Donata Medaglini,\* Ali M. Harandi, Tom H.M. Ottenhoff, Claire-Anne Siegrist, the  
VSV-EBOVAC Consortium

\*Corresponding author. E-mail: donata.medaglini@unisi.it

Published 9 December 2015, *Sci. Transl. Med.* **7**, 317ps24 (2015)  
DOI: 10.1126/scitranslmed.aad3106

**This PDF file includes:**

Table S1. Key VSV-EBOVAC data.

Table S2. List of VSV-EBOVAC consortium participants.

**Table S1. Key VSV-EBOVAC data**

|                                |                                                                                                                                                                                                    |
|--------------------------------|----------------------------------------------------------------------------------------------------------------------------------------------------------------------------------------------------|
| <b>Project title:</b>          | Vaccine safety and immunogenicity signatures of human responses to VSV-ZEBOV (VSV-EBOVAC)                                                                                                          |
| <b>IMI contribution:</b>       | 3.9 million €                                                                                                                                                                                      |
| <b>Total Cost:</b>             | 8 million €                                                                                                                                                                                        |
| <b>Project Coordinator:</b>    | Sclavo Vaccines Association, Prof. Donata Medaglini                                                                                                                                                |
| <b>Scientific Coordinator:</b> | University of Geneva, Prof. Claire-Anne Siegrist                                                                                                                                                   |
| <b>Partners:</b>               | 12 partners from 6 EU countries and the United States                                                                                                                                              |
| <b>Industrial Involvement:</b> | 1 SME and one Large Industry                                                                                                                                                                       |
| <b>Duration:</b>               | Three years (1 Mar 2015 – 28 Feb 2018)                                                                                                                                                             |
| <b>Overall goal:</b>           | Advance the development of the Ebola vaccine candidate VSV-ZEBOV, using cutting-edge technologies to carry out in-depth analyses of samples taken from clinical trials conducted in EU and Africa. |

**Table S2. List of VSV-EBOVAC consortium participants.**

| <b>Participant number</b> | <b>Participant organization name/<i>Principal investigator(s)</i></b>                                                                                | <b>Academia /Research Institute/<br/>Industry/ SME</b> | <b>Country</b> |
|---------------------------|------------------------------------------------------------------------------------------------------------------------------------------------------|--------------------------------------------------------|----------------|
| 1                         | Scavo Vaccines Association/ <i>Donata Medaglini</i>                                                                                                  | Non profit organization                                | Italy          |
| 2                         | University of Geneva/ <i>Claire-Anne Siegrist</i>                                                                                                    | Academic                                               | Switzerland    |
| 3                         | BioProtection Systems/ <i>Thomas Monath</i>                                                                                                          | Industry                                               | USA            |
| 4                         | Academisch Ziekenhuis Leiden/ <i>Tom Ottenhoff</i>                                                                                                   | Academic                                               | Netherlands    |
| 5                         | University of Gothenburg/ <i>Ali Harandi</i>                                                                                                         | Academic                                               | Sweden         |
| 6                         | University of Siena/ <i>Donata Medaglini</i>                                                                                                         | Academic                                               | Italy          |
| 7                         | Emory University/ <i>Rafi Ahmed</i>                                                                                                                  | Academic                                               | USA            |
| 8                         | The Chancellor, Masters and Scholars of the University of Oxford/ <i>Francis Ndungu</i>                                                              | Academic                                               | United Kingdom |
| 9                         | Eberhard Karls Universitaet Tuebingen/ <i>Peter Gottfried Kremser</i>                                                                                | Academic                                               | Germany        |
| 9a                        | Centre de Recherches Médicales de Lambaréné/ <i>Selidji Todagbe Agnandji</i>                                                                         | Research institute                                     | Gabon          |
| 10                        | MICROBIOTEC srl/ <i>Gianni Pozzi</i>                                                                                                                 | SME*                                                   | Italy          |
| 11                        | Spiez Laboratory, Federal Office for Civil Protection/ <i>Stephen Leib</i>                                                                           | Research institute                                     | Switzerland    |
| 12                        | Department of Health, Medicines and Healthcare Products Regulatory Agency -National Institute for Biological Standards and Control/ <i>Mark Page</i> | Research institute                                     | United Kingdom |

\*SME, Small and medium-sized enterprises
